# Supplementary material
Source: PubMed Central journal article supplement (PMC5730048)
Supplement: NIHMS74165-supplement-Supplementary_Information.pdf [file NIHMS74165-supplement-Supplementary_Information.pdf]

## **Supplementary Information**

### **Non-Immune Cells Equipped with T-Cell-Receptor-Like Signaling for Cancer Cell Ablation**

Ryosuke Kojima<sup>1</sup>, Leo Scheller<sup>1</sup>, Martin Fussenegger<sup>1,2</sup>

<sup>1</sup>ETH Zurich, Department of Biosystems Science and Engineering, Mattenstrasse 26, 4058 Basel, Switzerland. <sup>2</sup>Faculty of Life Science, University of Basel, Mattenstrasse 26, 4058 Basel, Switzerland.

## Inventory

### Supplementary Results

|                                                                                                                                                                                                 |    |
|-------------------------------------------------------------------------------------------------------------------------------------------------------------------------------------------------|----|
| <b>Supplementary Table 1.</b> Table of plasmids used in this study .....                                                                                                                        | 3  |
| <b>Supplementary Table 2.</b> Table of oligonucleotides used in this study .....                                                                                                                | 6  |
| <b>Supplementary Fig. 1.</b> System performance with the hetero type receptor sets (combination of ML39-IL4R $\alpha$ & FRB-IL13R $\alpha$ 1, FKBP-IL4R $\alpha$ & ML39-IL13R $\alpha$ 1) ..... | 7  |
| <b>Supplementary Fig. 2.</b> Comparison of promoter strength ( $P_{hCMV}$ vs $P_{SV40}$ ) by FACS analysis.....                                                                                 | 7  |
| <b>Supplementary Fig. 3.</b> Effect of sensor cell : target cell ratio on system performance .....                                                                                              | 8  |
| <b>Supplementary Fig. 4.</b> Generalizability of the cell contact sensing device.....                                                                                                           | 9  |
| <b>Supplementary Fig. 5.</b> Evaluation of bystander effect of VP22-FCU1 .....                                                                                                                  | 10 |
| <b>Supporting references</b> .....                                                                                                                                                              | 11 |

## Supplementary Results

In Supplementary Table 1 and 2, the plasmids and oligonucleotides used in this study are shown. In Supplementary Figure 1-5, additional data supporting that our system worked as designed and showing detailed performance of the system are described. Please see online methods section for the protocol of each experiment.

| Plasmid                          | Description and Cloning Strategy                                                                                                                                                                                                                                                                                                                                                                                                                                                                                                                                                                                                                                                                  | Reference/Source           |
|----------------------------------|---------------------------------------------------------------------------------------------------------------------------------------------------------------------------------------------------------------------------------------------------------------------------------------------------------------------------------------------------------------------------------------------------------------------------------------------------------------------------------------------------------------------------------------------------------------------------------------------------------------------------------------------------------------------------------------------------|----------------------------|
| <b>pHCM-CD43ex-45int-mCherry</b> | Constitutive expression vector of CD43ex-45int-mCherry ( $P_{hCMV}$ -CD43ex-45int-pA).                                                                                                                                                                                                                                                                                                                                                                                                                                                                                                                                                                                                            | James et al <sup>1</sup>   |
| <b>pLeo26</b>                    | An empty plasmid having SV40 promoter (having same structure as pcDNA3.1(+)) ( $P_{SV40}$ -MCS-pA <sub>bGH</sub> ). SV40 promoter region was PCR amplified from pSEAP2-Control Vector (Clontech) by oDA190 and oDA191. The amplified DNA fragment was digested with <i>MluI/NheI</i> and inserted into corresponding site of pcDNA3.1(+).                                                                                                                                                                                                                                                                                                                                                         | This work                  |
| <b>pLeo49</b>                    | Constitutive Igk leader sequence-FRB-MCS expression vector ( $P_{hCMV}$ -FRB-MCS-pA <sub>bGH</sub> ). FRB (bearing Igk leader) was PCR amplified with oLeo97 and oLeo98 from pMH228 <sup>2</sup> . The amplified fragment was digested with <i>NheI/EcoRI</i> , and was cloned into corresponding site of pcDNA3.1(+).                                                                                                                                                                                                                                                                                                                                                                            | This work                  |
| <b>pLeo50</b>                    | Constitutive Igk leader sequence-FKBP-MCS expression vector ( $P_{hCMV}$ -FKBP-MCS-pA <sub>bGH</sub> ). FKBP (bearing Igk leader) was PCR amplified with oLeo99 and oLeo100 from pMH229 <sup>2</sup> . The amplified fragment was digested with <i>NheI/EcoRI</i> , and was cloned into corresponding site of pcDNA3.1(+).                                                                                                                                                                                                                                                                                                                                                                        | This work                  |
| <b>pLeo52</b>                    | Constitutive Igk leader sequence-FRB-hIL13R $\alpha$ 1 expression vector ( $P_{hCMV}$ -FRB-hIL13R $\alpha$ 1-pA <sub>bGH</sub> ). hIL13R $\alpha$ 1 was PCR amplified from pCH023 (unpublished, provided by C. Helene, ETH-Zurich) with oLeo133 and oLeo134. The amplified fragment was digested with <i>EcoRI/NotI</i> , and was cloned into corresponding site of pLeo49.                                                                                                                                                                                                                                                                                                                       | This work                  |
| <b>pLeo53</b>                    | Constitutive Igk leader sequence-FKBP-hIL4R $\alpha$ expression vector ( $P_{hCMV}$ -Igk-FKBP-hIL4R $\alpha$ -pA <sub>bGH</sub> ). hIL4R $\alpha$ was PCR amplified from pCH024 (unpublished, provided by C. Helene, ETH-Zurich) with oLeo135 and oLeo136. The amplified fragment was digested with <i>EcoRI/NotI</i> , and was cloned into corresponding site of pLeo50.                                                                                                                                                                                                                                                                                                                         | This work                  |
| <b>pLeo56</b>                    | Constitutive Igk leader sequence-FKBP-mIL10R $\alpha$ expression vector ( $P_{hCMV}$ -Igk-FKBP-mIL10R $\alpha$ -pA <sub>bGH</sub> ). mIL10R $\alpha$ was cut out from pLS8 <sup>3</sup> with <i>EcoRI/NotI</i> , and was inserted into corresponding site of pLeo50.                                                                                                                                                                                                                                                                                                                                                                                                                              | This work                  |
| <b>pLeo57</b>                    | Constitutive Igk leader sequence-FRB-mIL10R $\beta$ expression vector ( $P_{hCMV}$ -Igk-FRB-mIL10R $\beta$ -pA <sub>bGH</sub> ). mIL10R $\beta$ was PCR amplified from pLS9 <sup>3</sup> with oLeo103 and oLeo129. The amplified fragment was digested with <i>EcoRV/NotI</i> , and was cloned into corresponding site of pLeo49.                                                                                                                                                                                                                                                                                                                                                                 | This work                  |
| <b>pLS12</b>                     | $P_{STAT6}$ driven SEAP expression vector ( $P_{STAT6}$ -SEAP-pA).                                                                                                                                                                                                                                                                                                                                                                                                                                                                                                                                                                                                                                | Schukur et al <sup>3</sup> |
| <b>pLS13</b>                     | $P_{STAT3}$ -driven SEAP expression vector ( $P_{STAT3}$ -SEAP-pA).                                                                                                                                                                                                                                                                                                                                                                                                                                                                                                                                                                                                                               | Schukur et al <sup>3</sup> |
| <b>pLS15</b>                     | Constitutive hSTAT3 expression vector ( $P_{hCMV}$ -hSTAT3-pA).                                                                                                                                                                                                                                                                                                                                                                                                                                                                                                                                                                                                                                   | Schukur et al <sup>3</sup> |
| <b>pLS16</b>                     | Constitutive hSTAT6 expression vector ( $P_{hCMV}$ -hSTAT6-pA).                                                                                                                                                                                                                                                                                                                                                                                                                                                                                                                                                                                                                                   | Schukur et al <sup>3</sup> |
| <b>pRK14</b>                     | Constitutive CD43ex-YFP expression vector ( $P_{hCMV}$ -CD43ex-YFP-pA <sub>SV40</sub> ). Extracellular and transmembrane domain of CD43 (CD43ex), whose <i>NheI</i> site is silently mutated, was amplified from a DNASU plasmid (HsCD00446356) by 2 step PCR. 1 <sup>st</sup> PCR: By using a DNASU plasmid (HsCD00446356) as a template, One fragment was amplified by oRK4 and oRK5, and another fragment was amplified by oRK6 and oRK7. 2 <sup>nd</sup> PCR: By using mixture of the 2 fragments obtained from 1 <sup>st</sup> PCR as templates, the CD43ex was amplified. The amplified fragment was digested with <i>NheI/AgeI</i> , and was inserted into corresponding site of pEYFP-C1. | This work                  |
| <b>pRK17</b>                     | A plasmid having a multi-cloning site followed by linker-CFP ( $P_{hCMV}$ -MCS (multiple cloning site)-CFP-pA <sub>bGH</sub> ). Linker-CFP was PCR amplified from pECFP-C1 (Clontech) by oRK22 and oRK23. The amplified DNA fragment was digested with <i>EcoRI/NotI</i> and inserted into corresponding site of pcDNA3.1(+).                                                                                                                                                                                                                                                                                                                                                                     | This work                  |
| <b>pRK21</b>                     | Constitutive HER2-iRFP670 expression vector ( $P_{hCMV}$ -HER2-iRFP-pA <sub>bGH</sub> ). HER2 was PCR amplified with oRK18 (having kozak) and oRK19 by using addgene #16257 (a gift from Mien-Chie Hung <sup>4</sup> ) as a template, and was digested with <i>HindIII/NotI</i> . iRFP670 was PCR amplified with oRK20 (having linker sequence) and oRK 21 by using pMM581 (unpublished) as a template, and was                                                                                                                                                                                                                                                                                   | This work                  |

|               |                                                                                                                                                                                                                                                                                                                                                                                                                                                                                                                                                                                                                                                                                              |           |
|---------------|----------------------------------------------------------------------------------------------------------------------------------------------------------------------------------------------------------------------------------------------------------------------------------------------------------------------------------------------------------------------------------------------------------------------------------------------------------------------------------------------------------------------------------------------------------------------------------------------------------------------------------------------------------------------------------------------|-----------|
|               | digested with <i>NorI/XbaI</i> . These 2 fragments were sequentially inserted in the corresponding sites of pcDNA3.1(+).                                                                                                                                                                                                                                                                                                                                                                                                                                                                                                                                                                     |           |
| <b>pRK22</b>  | Constitutive iRFP670 expression vector ( $P_{hCMV}$ -iRFP-pA <sub>BGH</sub> ). iRFP670 was PCR amplified with oRK30 (having kozak sequence) and oRK21 by using pMM581 (unpublished, a gift from Marius Muller, ETH Zurich) as a template, and was digested with <i>HindIII/XbaI</i> . The fragment was inserted in the corresponding site of pcDNA3.1(+).                                                                                                                                                                                                                                                                                                                                    | This work |
| <b>pRK96</b>  | Constitutive CD43ex-45int expression vector ( $P_{hCMV}$ -CD43ex-45int-pA <sub>BGH</sub> ). CD43ex-45int was cut out from pHCM-CD43TMCD45Cyt (a gift from John James and Ron Vale <sup>1</sup> ) with <i>BglII/NorI</i> (additional treatment of the fragment with <i>HindIII/XbaI</i> was necessary to remove another fragment from the vector), and was inserted to the pcDNA 3.1 digested with <i>BamHI/NorI</i> .                                                                                                                                                                                                                                                                        | This work |
| <b>pRK114</b> | Constitutive Igκ leader signal-ML39-hIL13Rα1 expression vector ( $P_{hCMV}$ -ML39-hIL13Rα1-pA <sub>BGH</sub> ). DNA encoding ML39 (anti-HER2 scFv) (addgene #10794, a gift from Judy Lieberman <sup>5</sup> ) was PCR amplified with oRK41 (having kozak and additional Igκ leader) and oRK139 and was digested with <i>NheI/EcoRI</i> . This fragment was inserted in the corresponding site of pLeo52.                                                                                                                                                                                                                                                                                     | This work |
| <b>pRK115</b> | Constitutive Igκ leader signal-ML39-full hIL4Rα expression vector ( $P_{hCMV}$ -ML39-hIL4Rα-pA <sub>BGH</sub> ). DNA encoding ML39 (anti HER2 scFv) (addgene #10794) was PCR amplified with oRK41 (having kozak, additional Igκ signal) and oRK139, and was digested with <i>NheI/EcoRI</i> . Also, additional fragment cut out from pLeo53 with <i>EcoRI/XhoI</i> (1216bp) was prepared. These 2 fragments were inserted in pLeo52 digested with <i>NheI/XhoI</i> (3 piece ligation).                                                                                                                                                                                                       | This work |
| <b>pRK119</b> | Constitutive Igκ leader signal-ML39-CD28hinge-truncated hIL4Rα (transmembrane and cytosolic domain) expression vector ( $P_{hCMV}$ -ML39-CD28 <sub>hinge</sub> -hIL4Rα $\Delta$ ex-pA <sub>BGH</sub> ). DNA encoding transmembrane and cytosolic domain of hIL4Rα was PCR amplified by oRK143 (having additional CD28 hinge domain) and oRK140 using pLeo53 as a template and was digested with <i>EcoRI/XbaI</i> . This fragment was inserted in corresponding site of pRK115.                                                                                                                                                                                                              | This work |
| <b>pRK122</b> | Plasmid vector expressing the same protein as pRK119 driven by SV40 promoter ( $P_{SV40}$ -ML39-hIL4Rα $\Delta$ ex-pA <sub>BGH</sub> ). Two fragments were prepared from pRK119 (1 <sup>st</sup> fragment: 846bp digested with <i>NheI/EcoRI</i> , 2 <sup>nd</sup> fragment: 3027 bp digested with <i>EcoRI/EagI</i> ) and were inserted into pLeo26 digested with <i>NheI/EagI</i> (3 piece ligation)                                                                                                                                                                                                                                                                                       | This work |
| <b>pRK123</b> | Plasmid vector expressing the same protein as pRK114 driven by SV40 promoter ( $P_{SV40}$ -ML39-hIL13Rα1-pA <sub>BGH</sub> ). Protein-coding region was cut out by <i>NheI/ApaI</i> from pRK114. This fragment was inserted into corresponding site of pLeo26.                                                                                                                                                                                                                                                                                                                                                                                                                               | This work |
| <b>pRK130</b> | Constitutive FCU1 (Yeast cytosine deaminase (FCY1)- Yeast uracil phosphoribosyltransferase (FUR1) conjugate) expression vector ( $P_{hCMV}$ -FCU1-pA <sub>BGH</sub> ). FCY1 was PCR amplified by oRK148 (having <i>EcoRI-KpnI</i> -GGSGG linker-kozak sequence for constructing pRK131 as well) and oRK149 (having overlapping sequence with FUR1) from DNASU ScCD00009048. Also, FUR1 was PCR amplified with oRK150 (having overlapping sequence with FCY1) and oRK151 from DNASU ScCD00009899. Then, these 2 fragments were connected by PCR with oRK148/oRK151, yielding FCU1. This fragment was digested with <i>EcoRI/NotI</i> and was inserted into corresponding site of pcDNA3.1(+). | This work |
| <b>pRK131</b> | Constitutive VP22-FCU1 expression vector ( $P_{hCMV}$ -VP22-FCU1-pA <sub>BGH</sub> ). The DNA fragment encoding FCU1 produced while constructing pRK130 was digested with <i>KpnI/NotI</i> , and was inserted into corresponding site of pVP22/myc-His (Invitrogen).                                                                                                                                                                                                                                                                                                                                                                                                                         | This work |
| <b>pRK132</b> | Constitutive expression vector of secreted version of VP22 targeted to HER2 by ML39. ( $P_{hCMV}$ -Igκ-ML39-FCU1-pA <sub>BGH</sub> ) The DNA fragment encoding FCU1 produced when constructing pRK130 was digested with <i>EcoRI/NotI</i> , and was inserted into pRK115 digested with <i>EcoRI/NotI</i> (replacement with hIL4Rα).                                                                                                                                                                                                                                                                                                                                                          | This work |
| <b>pRK144</b> | SV40-promoter-driven SP6 (irrelevant targeting moiety)-hIL13Rα1 expression vector ( $P_{SV40}$ -SP6-hIL13Rα1-pA <sub>BGH</sub> ). SP6 (including secretion signal) was PCR amplified by oRK174 and oRK177 from pAT04 (unpublished, a gift from Aizhan Tastan in ETH Zurich. This construct encodes SP6 provided by Steven A. Rosenberg <sup>6</sup> ). The amplified DNA fragment was digested with <i>NheI/EcoRI</i> and was inserted into pRK 123 digested with <i>NheI/EcoRI</i> .                                                                                                                                                                                                        | This work |
| <b>pRK145</b> | SV40-promoter-driven SP6 (irrelevant targeting moiety)-hIL4Rα $\Delta$ ex expression vector ( $P_{SV40}$ -SP6-hIL4Rα $\Delta$ ex-pA <sub>BGH</sub> ). The DNA fragments encoding hIL4Rα $\Delta$ ex was cut out from pRK119 with <i>EcoRI/XbaI</i> . This fragment was inserted in pRK144 digested with <i>EcoRI/XbaI</i> .                                                                                                                                                                                                                                                                                                                                                                  | This work |
| <b>pRK153</b> | An empty plasmid having STAT6 promoter (having the same structure as                                                                                                                                                                                                                                                                                                                                                                                                                                                                                                                                                                                                                         | This work |

|               |                                                                                                                                                                                                                                                                                                                                                                                                                                                                                                       |           |
|---------------|-------------------------------------------------------------------------------------------------------------------------------------------------------------------------------------------------------------------------------------------------------------------------------------------------------------------------------------------------------------------------------------------------------------------------------------------------------------------------------------------------------|-----------|
|               | pcDNA3.1) (P <sub>STAT6</sub> -MCS-pA <sub>BGH</sub> ). P <sub>STAT6</sub> coding region was PCR amplified with oRK182 and oRK183 using pLS12 as a template. The DNA fragment was digested with <i>NheI/MfeI</i> and was inserted into corresponding site of pcDNA3.1(+).                                                                                                                                                                                                                             |           |
| <b>pRK163</b> | Plasmid expressing the same construct as pRK122, whose <i>NheI</i> site in the sequence of hIL4R $\alpha$ is silently mutated. For the mutation, an one-step plasmid mutagenesis protocol <sup>7</sup> was used with oRK190 and oRK191 as primers, and pRK122 as a template.                                                                                                                                                                                                                          | This work |
| <b>pRK173</b> | Plasmid vector expressing Igk leader sequence-9_26 (a DARPin against HER2 <sup>8</sup> )-full hIL13R $\alpha$ 1 under SV40 promoter (P <sub>SV40</sub> -9_26-hIL13R-pA <sub>BGH</sub> ). The DARPin 9_26 was PCR amplified with oRK197 (having additional Igk leader sequence) and oRK198 using 9_26_in_pQE30_2xstop_(corr31) (a gift from Pluckthun lab, ETH Zurich) as a template. This fragment was digested with <i>NheI/EcoRI</i> and was inserted into pRK123 digested with <i>NheI/EcoRI</i> . | This work |
| <b>pRK174</b> | Plasmid vector expressing Igk leader sequence-9_26- hIL4R $\alpha$ $\Delta$ ex under SV40 promoter (P <sub>SV40</sub> -9_26-hIL4R $\alpha$ $\Delta$ ex-pA <sub>BGH</sub> ). The DNA fragment coding Igk-9_26 (the fragment produced while constructing pRK173) was digested with <i>NheI/EcoRI</i> and was inserted into corresponding site of pRK163.                                                                                                                                                | This work |
| <b>pRK182</b> | Plasmid vector expressing Igk leader sequence-Ec4 (a DARPin against Epcam <sup>9</sup> )-hIL13R $\alpha$ 1 under SV40 promoter (P <sub>SV40</sub> -Ec4-hIL13R $\alpha$ 1-pA <sub>BGH</sub> ). The DARPin Ec4 was PCR amplified with oRK197 (having additional Igk leader sequence) and oRK199 using pQE30ss_Ec4_corr31 (a gift from Pluckthun lab, ETH Zurich) as a template. This fragment was digested with <i>NheI/EcoRI</i> and was inserted into pRK123 digested with <i>NheI/EcoRI</i> .        | This work |
| <b>pRK183</b> | Plasmid vector expressing Igk leader sequence-Ec4-hIL4R $\alpha$ $\Delta$ ex under SV40 promoter (P <sub>SV40</sub> -Ec4-hIL4R $\alpha$ $\Delta$ ex-pA <sub>BGH</sub> ). The DNA fragment coding Igk-Ec4 (the fragment produced when constructing pRK182) was digested with <i>NheI/EcoRI</i> and was inserted into pRK163 digested with <i>NheI/EcoRI</i> .                                                                                                                                          | This work |
| <b>pRK187</b> | Lentivirus vector for constitutive expression of Epcam and ZsGreen (PEF1 $\alpha$ -Epcam-IRES-ZsGreen). Epcam was PCR amplified with oRK200 (having additional kozak sequence) and oRK201 by using addgene #32751 (a gift from Alexander Sorokin <sup>10</sup> ) as a template. This DNA fragment was digested with <i>NotI/XbaI</i> , and was inserted into corresponding site of pHIV-Luc-ZsGreen (addgene #39196, a gift from Bryan Welm) (replacement with Luc)                                   | This work |
| <b>pRK223</b> | Plasmid vector expressing VP22-FCU1 under STAT6 promoter (P <sub>STAT6</sub> -VP22-FCU1-pA <sub>BGH</sub> ). VP22-FCU1 was cut out from pRK131 with <i>HindIII/XbaI</i> and was inserted into pRK153 digested with <i>HindIII/XbaI</i> .                                                                                                                                                                                                                                                              | This work |
| <b>pRK290</b> | Constitutive expression vector of CD43tm-45int. (P <sub>hCMV</sub> -CD43ex-45int-pA <sub>BGH</sub> ) The DNA fragment encoding CD43tm-45int was PCR amplified with oRK301 (bearing Igk leader sequence and Glycine) and oRK302 by using pRK96 as a template. The DNA fragment was digested with <i>NheI/ApaI</i> , and was cloned into corresponding site of pcDNA3.1(+).                                                                                                                             | This work |
| <b>pRK291</b> | Constitutive expression vector of Lyn-CD45int (P <sub>hCMV</sub> -Lyn-CD45int-pA <sub>BGH</sub> ) The DNA fragment encoding Lyn-CD45int was PCR amplified with oRK303 (bearing Lyn) and oRK302 by using pRK96 as a template. The DNA fragment was digested with <i>NheI/ApaI</i> , and was cloned into corresponding site of pcDNA3.1(+).                                                                                                                                                             | This work |
| <b>pRK292</b> | Constitutive Igk leader signal-ML39-hIL4R $\alpha$ $\Delta$ int-CFP expression vector (P <sub>hCMV</sub> -ML39-hIL4R $\alpha$ $\Delta$ int-CFP-pA <sub>BGH</sub> ). DNA encoding ML39-hIL4R $\alpha$ $\Delta$ int was PCR amplified by oRK304 and oRK305 using pRK115 as a template. The DNA fragment was digested with <i>NheI/BstXI</i> , and was inserted into corresponding site of pRK17.                                                                                                        | This work |
| <b>pRK293</b> | Constitutive Igk leader signal-ML39-hIL4R $\alpha$ tm-CFP expression vector (P <sub>hCMV</sub> -ML39-hIL4R $\alpha$ tm-CFP-pA <sub>BGH</sub> ) (tm: transmembrane domain). DNA encoding ML39-hIL4R $\alpha$ tm was PCR amplified by oRK304 and oRK305 using pRK122 as a template. The DNA fragment was digested with <i>NheI/BstXI</i> , and was inserted into corresponding site of pRK17.                                                                                                           | This work |
| <b>pRK295</b> | Expression vector having the same structure as pRK293 driven by P <sub>SV40</sub> promoter (P <sub>SV40</sub> -ML39-hIL4R $\alpha$ $\Delta$ ex&int-CFP-pA <sub>BGH</sub> ). Protein coding region of pRK293 was digested out with <i>NheI/ApaI</i> , and was cloned into corresponding site of pLeo26.                                                                                                                                                                                                | This work |

**Supplementary table 1:** Table of plasmids used in this study.

| Oligo number   | Sequence                                                                                                            |
|----------------|---------------------------------------------------------------------------------------------------------------------|
| <b>oLeo97</b>  | AACCAAGCTAGCATGGAGACAGACACACTCCTGCTATGGGTACTGCTGCTCTGGGTCCA<br>GGTCCACTGGTGACGGAGATATACATATGGCCTCTCGC               |
| <b>oLeo98</b>  | TCTAGAGAATTCTTTGCTGATACGGCGGAACAC                                                                                   |
| <b>oLeo99</b>  | AACCAAGCTAGCATGGAGACAGACACACTCCTGCTATGGGTACTGCTGCTCTGGGTCCA<br>GGTCCACTGGTGACATGGGCGTTCAGGTTGAAACC                  |
| <b>oLeo100</b> | TCTAGAGAATTCTTCCAGTTTCAGCAGTTCC                                                                                     |
| <b>oLeo103</b> | TTCTGCAGATATCCAATGATTCCACCCCTGAGAAGG                                                                                |
| <b>oLeo129</b> | TTCTGCAGATATCCAATGATTCCACCCCTGAGAAGG                                                                                |
| <b>oLeo133</b> | AACCAAGAATTCCTACGGAAACTCAGCCACCT                                                                                    |
| <b>oLeo134</b> | AACCAAGCGGCCGCTCACTGAGAGGCTTTCTTCAGG                                                                                |
| <b>oLeo135</b> | AACCAAGAATTCATGAAGGTCTTGCAAGGAGCC                                                                                   |
| <b>oLeo136</b> | AACCAAGCGGCCGCTAAGAGACCCTCATGTATGTGGG                                                                               |
| <b>oDA190</b>  | CCGATTACGCGT GATCTGCGATCTGCATCTCAATTAG                                                                              |
| <b>oDA191</b>  | GGCAGCTAGC GCGATTGCAAGCTTTTTG                                                                                       |
| <b>oRK4</b>    | ATCGgctagcGCCACCatggccagctctctctctctctg                                                                             |
| <b>oRK5</b>    | gtctccagagagctgctgctgctgctg                                                                                         |
| <b>oRK6</b>    | accacggcagccagctctctggagac                                                                                          |
| <b>oRK7</b>    | ctgaACCGGTcctccagcgcaccagctcccccctctgctg                                                                            |
| <b>oRK18</b>   | actgAAGCTTgcCACCATGGAGCTGGCGGCCTTG                                                                                  |
| <b>oRK19</b>   | ATTAgcgccgcCACTGGCACGTCCAGACCCAGG                                                                                   |
| <b>oRK20</b>   | AAGTgcgccgcCGGCTCCGGAGGAATGACTAGTgcgctaaagctgatctca                                                                 |
| <b>oRK21</b>   | ATGctctagaCTAGAcACCGGTGGATCCGCTAGC                                                                                  |
| <b>oRK22</b>   | atgaGAATTcgggtgctccggaggaATGGTGAGCAAGGGCGAGGAGCTG                                                                   |
| <b>oRK23</b>   | ATTAgcgccgcCTTGTACAGCTCGTCCATGCCGAGAGT                                                                              |
| <b>oRK30</b>   | actgAAGCTTgcCACCATGGAGCTGGCGGCCTTG                                                                                  |
| <b>oRK41</b>   | taatGCTAGCgccaccATGGAGACAGACACTCCTGCTATGGGTACTGCTGCTCTGGGTCCA<br>GGTCCACTGGTGACATGGCCCAGGTGCAGCTGGT                 |
| <b>oRK139</b>  | ATTgaattcACCTAGGACGGTCAGCTTGGTTCCTC                                                                                 |
| <b>oRK140</b>  | ATTAtctagaCTAAGAGACCCTCATGTATGTGGGTCCAC                                                                             |
| <b>oRK143</b>  | ATTTGAATTTCGTGAAAGGGAAACACTTTGTCCAAGTCCCCTATTTCCCGGACCTTCTAAG<br>CCCGGATCCCCTCTGCTGGCGTCAGCGTTTC                    |
| <b>oRK148</b>  | attaGAATTCGGTACCggtgctcaggtggccaccATGGTGACAGGGGGAATGGCAAGC                                                          |
| <b>oRK149</b>  | GTTCTTAAATGGTTCGGAAGACTACCAATATCTTCAAACCAATCCTGAGGTCTTTC                                                            |
| <b>oRK150</b>  | GAAGATATTGGTGAGTCTTCGGAACCATTAAAGAACGTCTACTTGCTACC                                                                  |
| <b>oRK151</b>  | GATTgcgccgcTTAAACACAGTAGTATCTGTACCAAAGTCACCCAAC                                                                     |
| <b>oRK174</b>  | TAATgctagcgcaccATGACCCAGTCTCCAAAATTCATGTCC                                                                          |
| <b>oRK177</b>  | AATgaattcCGTAGTTCCTTGGCCCCAGTAAGCAAG                                                                                |
| <b>oRK182</b>  | ATTaattgccccgaaaagtgccacctgacgtC                                                                                    |
| <b>oRK183</b>  | actgGCTAGCttaattaaCGCGGAGGCTGGATCGGTCCCCGGTGTC                                                                      |
| <b>oRK190</b>  | TTGGGGCcAGCAGTGGGGAAGAGGGGTATAAGCCTTTC                                                                              |
| <b>oRK191</b>  | CACTGCTgGCCCCAAACCCACATTTCTCTGGGGACACAGC                                                                            |
| <b>oRK197</b>  | attgGCTAGCTTAATTAAGccaccATGGAGACAGACACTCCTGCTATGGGTACTGCTGCTCT<br>GGTTCAGGTTCCTACTGGTGACAGAGGATCGCATCACCATCACCATCAG |
| <b>oRK198</b>  | ATTgaattcATTAAGCTTTTGCAGGATTTTCAGCCAGGTCC                                                                           |
| <b>oRK199</b>  | ATTgaattcATTAAGCTTCGCCGCTTTTTGCAGCAC                                                                                |
| <b>oRK200</b>  | ATTAgcgccgcGAATTCgccaccATGGCGCCCCGAGGTCTCT                                                                          |
| <b>oRK201</b>  | attaTCTAGActaTGCATTGAGTTCCTATGCATCTCACCACAT                                                                         |
| <b>oRK301</b>  | ACTTgtagccaccATGGAGACAGACACTCCTGCTATGGGTACTGCTGCTCTGGGTCCAGG<br>TTCCACTGGTGACGGAggcatgctgcccagtgctgctg              |
| <b>oRK302</b>  | TAATggccctcacgaacctgattaaagctggacttgagg                                                                             |
| <b>oRK303</b>  | AATgtagccaccatgggatgtataaaatcaaaaggaaagacagcgcgggaggtcaggtgctcaggaggagatcctgatgaacagcagg<br>agcttggtg               |
| <b>oRK304</b>  | taatGCTAGCgccaccATGGAGACAGACACTCCTGCTATGGG                                                                          |
| <b>oRK305</b>  | taatCCACCACACTGGcAATCTTGGTGATGCTGACATAGCACAACAGGC                                                                   |

**Supplementary table 2:** Table of oligonucleotides used in this study.

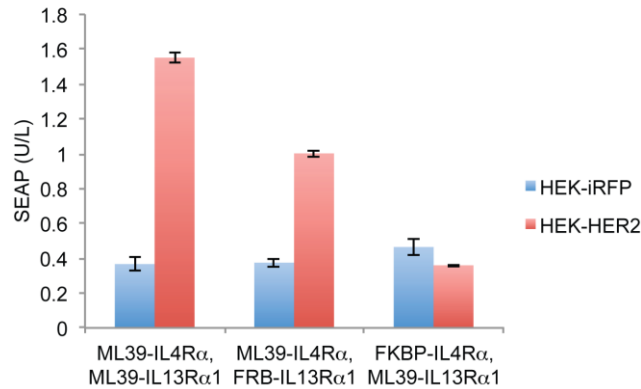

**Supplementary Fig. 1.** Evaluation of hetero type receptor sets. The sensor HEK-293T cells (per well of 24-well plate) were transfected with 100 ng of pRK96 ( $P_{hCMV}$ -CD43ex-45int-pA), 100 ng of pLS16 ( $P_{hCMV}$ -STAT6-pA), and 100 ng of pLS12 ( $P_{STAT6}$ -SEAP-pA), as well as 100 ng each of following interleukin receptors. Left: pRK115 ( $P_{hCMV}$ -ML39-IL4R $\alpha$ -pA) and pRK114 ( $P_{hCMV}$ -ML39-IL13R $\alpha$ 1-pA), middle: pRK115 and pLeo52 ( $P_{hCMV}$ -FRB-IL13R $\alpha$ 1-pA), right: pLeo53 ( $P_{hCMV}$ -FKBP-IL4R $\alpha$ -pA) and pRK114. After mixing the sensor cells with HEK-HER2 (target) or HEK-iRFP (non-target) cells, SEAP secreted from the sensor cells was assayed (with the same method as for Fig. 2b). The data are the mean  $\pm$  SEM of three independent experiments measured in triplicate (n=3).

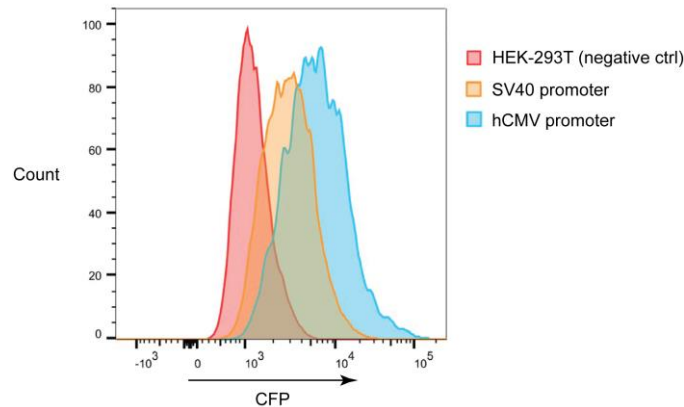

**Supplementary Fig. 2.** Comparison of promoter strength of hCMV promoter ( $P_{hCMV}$ ) and SV40 promoter ( $P_{SV40}$ ). HEK-293T cells were transfected (per well of 24-well plate) with 250 ng of either pRK293 ( $P_{hCMV}$ -ML39-IL4R $\alpha$ tm-CFP-pA) (tm: transmembrane domain) or pRK295 ( $P_{SV40}$ -ML39-IL4R $\alpha$ tm-CFP-pA) as well as 250 ng of pHCM-CD43ex-CD45int-mCherry (LTR- $P_{hCMV}$ -CD43ex-45int-mCherry-LTR). Then, CFP fluorescence of mCherry positive cells was monitored by FACS BD LSRFortessa (Negative control was normal HEK-293T cells).

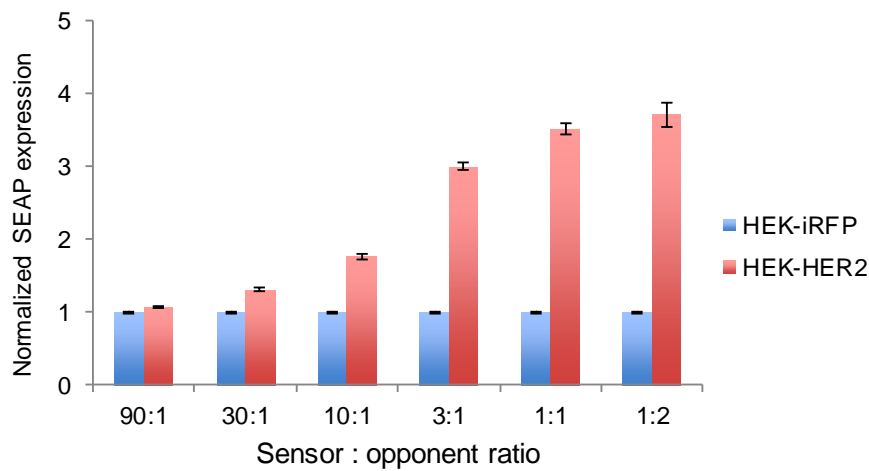

**Supplementary Fig. 3.** Effect of sensor cell / target (non-target) cell ratio on the system performance. The sensor HEK-293T cells were constructed by the same method as for Fig.3b (the optimized device with truncated receptor). These sensor cells were mixed with HEK-HER2 cells or HEK-iRFP cells under the following conditions in 1.5 mL tubes. Total number of sensor and opponent cells:  $2.0 \times 10^5$  cells. Ratio of sensor cells to opponent cells: 90:1, 30:1, 10:1, 3:1, 1:1, or 1:2. Tubes were incubated at 37 °C for 30 min, then DMEM was added to make 500  $\mu$ L, and the cell suspension was seeded on 24-well plates. 24 hours later, SEAP value in the supernatant was tested. (normalized to SEAP expression level when mixed with HEK-iRFP cells in each condition. The data are the mean  $\pm$  SEM of three independent experiments measured in triplicate (n=3).



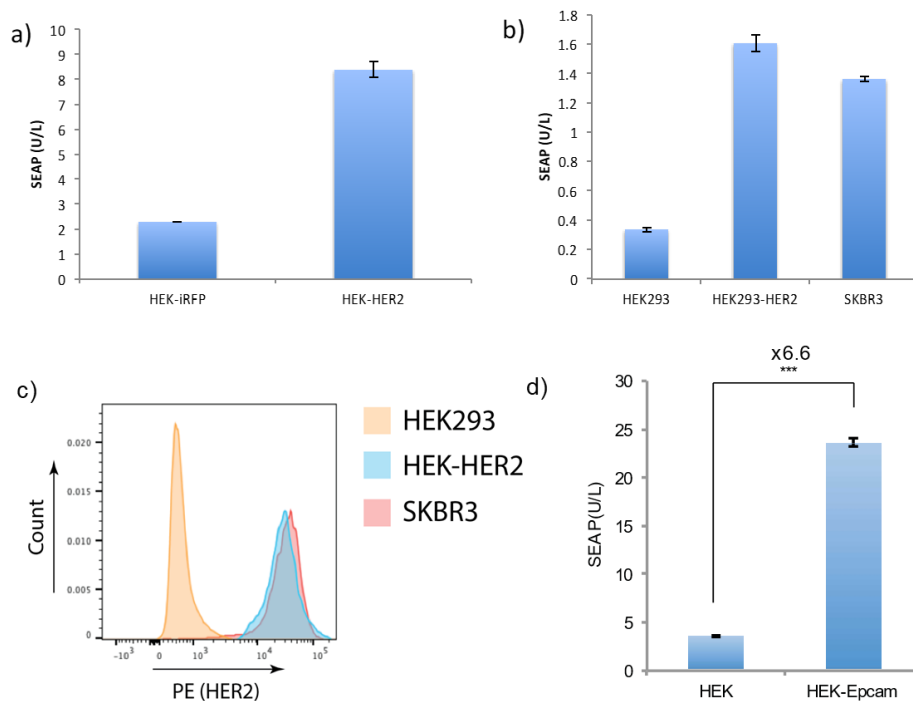

**Supplementary Fig. 4.** Generalizability of the specific cell-contact-sensing system. (a) System performance with an anti-HER2 DARPin, 9<sub>26</sub><sup>8</sup>. The sensor cells were transfected (per well of 24-well plate) with 200 ng of pRK96 (P<sub>hCMV</sub>-CD43<sub>ex-45int</sub>-pA), 50 ng of pRK174 (P<sub>SV40</sub>-9<sub>26</sub>-hIL4R $\alpha$  $\Delta$ ex-pA), 50 ng of pRK173 (P<sub>SV40</sub>-9<sub>26</sub>-hIL13R $\alpha$ 1-pA), 100 ng of pLS16 (P<sub>hCMV</sub>-STAT6-pA), and 100 ng of pLS12 (P<sub>STAT6</sub>-SEAP-pA). Then, the sensor cells were mixed with HEK-iRFP or HEK-HER2 cells. SEAP activity was measured at 24 hours after cell mixing (the same method as for Fig. 2b). (b) System performance in hMSC-TERT cells (against HEK-293-HER2 (model) and SKBR3 (cancer cells)). hMSC-TERT cells were transfected (per well of 24-well plate) with 200 ng of pRK96, 100 ng of pLS12, 50 ng of pRK122 (P<sub>SV40</sub>-ML39-hIL4R $\alpha$  $\Delta$ ex-pA) and 50 ng of pRK123 (P<sub>SV40</sub>-ML39-hIL13R $\alpha$ 1-pA). Then, the transfected hMSC-TERT cells were mixed with HEK-iRFP, HEK-HER2, or SKBR3 cells. SEAP activity was measured at 24 hours after cell mixing (the same method as for Fig. 2b). (c) Confirmation of HER2 expression on HEK-HER2 cells (our model cell line) and SKBR3 cells. HEK-293, HEK-HER2, SKBR3 cells were stained with a PE-labeled anti-HER2 antibody (Biolegend #324405) in FACS buffer (DPBS containing 0.5 % BSA), and were analyzed by FACS BD LSRForsetta. HER2 expression level on SKBR3 cells is comparable to that on our model target cells, HEK-HER2. (d) Performance of Epcam-sensing device. Sensor HEK-293T cells were transfected (per well of 24-well plate) with Epcam-sensing components as follows. 50 ng of RK182 (P<sub>SV40</sub>-Ec4-hIL4R $\alpha$  $\Delta$ ex-pA) (Ec4: anti-Epcam DARPin<sup>9</sup>), 50 ng of pRK183 (P<sub>SV40</sub>-Ec4-hIL13R $\alpha$ 1-pA), 200 ng of pRK96, 100 ng of pLS16, and 100 ng of pLS12. Then, the sensor cells were mixed with HEK-293 or HEK-Epcam cells (with the same cell number and dilution as for Fig. 2b). SEAP secreted from the sensor cells was assayed.

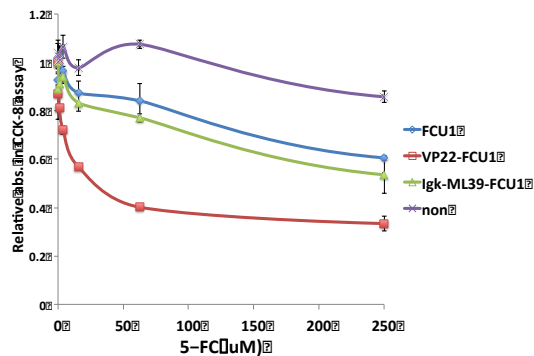

**Supplementary Fig. 5.** Evaluation of bystander effect of VP22-FCU1 for cell-based enzyme-prodrug cancer therapy in our setting. hMSC-TERT cells were transfected (per well of 24-well plate) with 50 ng of pRK122 (P<sub>SV40</sub>-ML39-hIL4R $\alpha$ Δex-pA), 50 ng of pRK123 (P<sub>SV40</sub>-ML39-hIL13R $\alpha$ 1-pA), 200 ng of pRK96 (P<sub>hCMV</sub>-CD43ex-45int-pA), 100 ng of pLS16 (P<sub>hCMV</sub>-STAT6-pA), together with 100 ng of one of following plasmids: pcDNA3.1(+) (for non), pRK130 (P<sub>hCMV</sub>-FCU1-pA, for expressing cytosolic FCU1), pRK 131 (P<sub>hCMV</sub>-VP22-FCU1-pA, for expressing cell penetrating FCU1), or pRK132 (P<sub>CMV</sub>-Ig $\kappa$  secretion signal (leader sequence from mouse immunoglobulin  $\kappa$  light chain)-ML39-FCU1-pA, for expressing secreted and HER2-targeted FCU1). At 14 hours after transfection, the medium was changed to fresh DMEM. At 24 hours after transfection, cells were detached in cell dissociation buffer, spun down, and suspended in 40  $\mu$ L of DMEM. Then, 10  $\mu$ L of the cell suspension (containing  $6.0 \times 10^4$  cells) was mixed with another cell suspension (40  $\mu$ L) containing  $2.4 \times 10^5$  cells of SKBR3 cells in 1.5 mL tubes. After incubation for 30 min at 37 °C, fresh DMEM was added so that  $2.5 \times 10^3$  cells of the transfected hMSC-TERT cells and  $1.0 \times 10^4$  cells of SKBR3 cells were suspended in 100  $\mu$ L, and the cell suspension was seeded on a flat bottom 96-well plate (Thermo Fischer Scientific) (100  $\mu$ L/well). At 5 hrs after cell seeding, various amounts of 5-FC were added. After 4 days, cell viability was determined with a CCK-8 assay (Dojindo) according to the manufacturer's protocol. The data are the mean  $\pm$  SEM of three independent experiments measured in triplicate (n=3)

### Supporting references

1. James, J.R. & Vale, R.D. Biophysical mechanism of T-cell receptor triggering in a reconstituted system. *Nature* **487**, 64-69 (2012).
2. Horner, M. et al. A chemical switch for controlling viral infectivity. *Chem. Commun.* **50**, 10319-10322 (2014).
3. Schukur, L., Geering, B., Charpin-El Hamri, G. & Fussenegger, M. Implantable synthetic cytokine converter cells with AND-gate logic treat experimental psoriasis. *Sci. Transl. Med.* **7**, 318ra201 (2015).
4. Li, Y.M. et al. Upregulation of CXCR4 is essential for HER2-mediated tumor metastasis. *Cancer Cell* **6**, 459-469 (2004).
5. Song, E. et al. Antibody mediated in vivo delivery of small interfering RNAs via cell-surface receptors. *Nat. Biotechnol.* **23**, 709-717 (2005).
6. Chinnasamy, D. et al. Gene therapy using genetically modified lymphocytes targeting VEGFR-2 inhibits the growth of vascularized syngenic tumors in mice. *J. Clin. Invest.* **120**, 3953-3968 (2010).
7. Liu, H. & Naismith, J.H. An efficient one-step site-directed deletion, insertion, single and multiple-site plasmid mutagenesis protocol. *BMC Biotechnol.* **8**, 91 (2008).
8. Steiner, D., Forrer, P. & Pluckthun, A. Efficient selection of DARPins with sub-nanomolar affinities using SRP phage display. *J. Mol. Biol.* **382**, 1211-1227 (2008).
9. Stefan, N. et al. DARPins recognizing the tumor-associated antigen EpCAM selected by phage and ribosome display and engineered for multivalency. *J. Mol. Biol.* **413**, 826-843 (2011).
10. Carter, R.E. & Sorkin, A. Endocytosis of functional epidermal growth factor receptor-green fluorescent protein chimera. *J. Biol. Chem.* **273**, 35000-35007 (1998).
